# Supplementary material for: Antisera Produced Using an E. coli-Expressed SARS-CoV-2 RBD and Complemented with a Minimal Dose of Mammalian-Cell-Expressed S1 Subunit of the Spike Protein Exhibits Improved Neutralization
Source: MDPI journal article supplement (doi:10.3390/ijms241310583), 2023-06-24
Supplement: s1 [file s1]

## Supplemental Figures

Figure S1

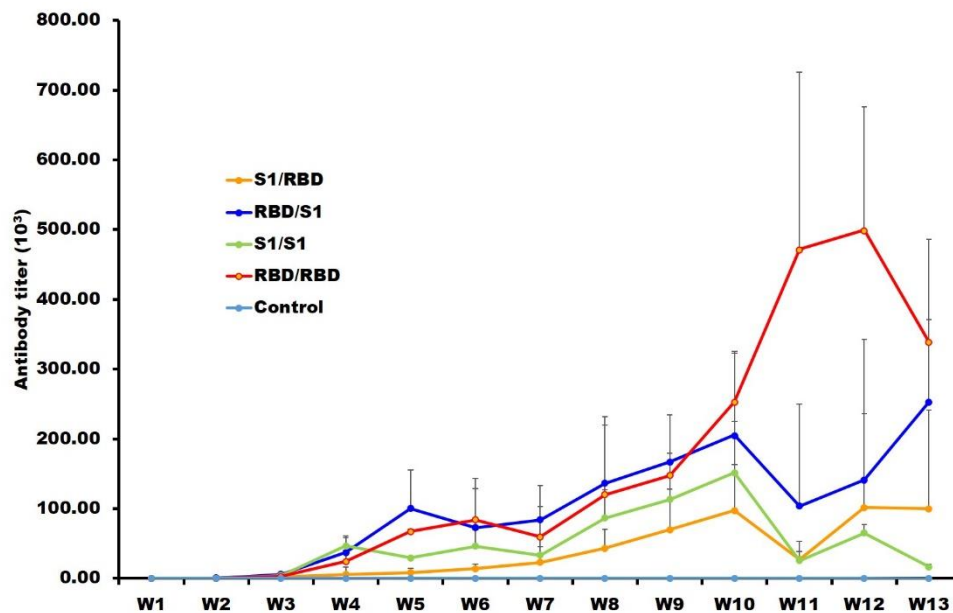

**Long-term persistence of SARS-CoV-2-RBD-induced immune response in mice:** The average anti-SARS-CoV-2-RBD titers produced by the immunization groups remained high for 13 weeks, indicating a long-term immune response. Anti-SARS-CoV-2 RBD sera (IgG) titer assayed by ELISA: IgG detection by ELISA was performed using the tail bleeding (TB) sera. **W** indicates the tail bleeding week. (A) Each line shows the average IgG titer of the mice in each group. **The results are indicated as mean  $\pm$  standard deviation (SD).**

Figure S2:

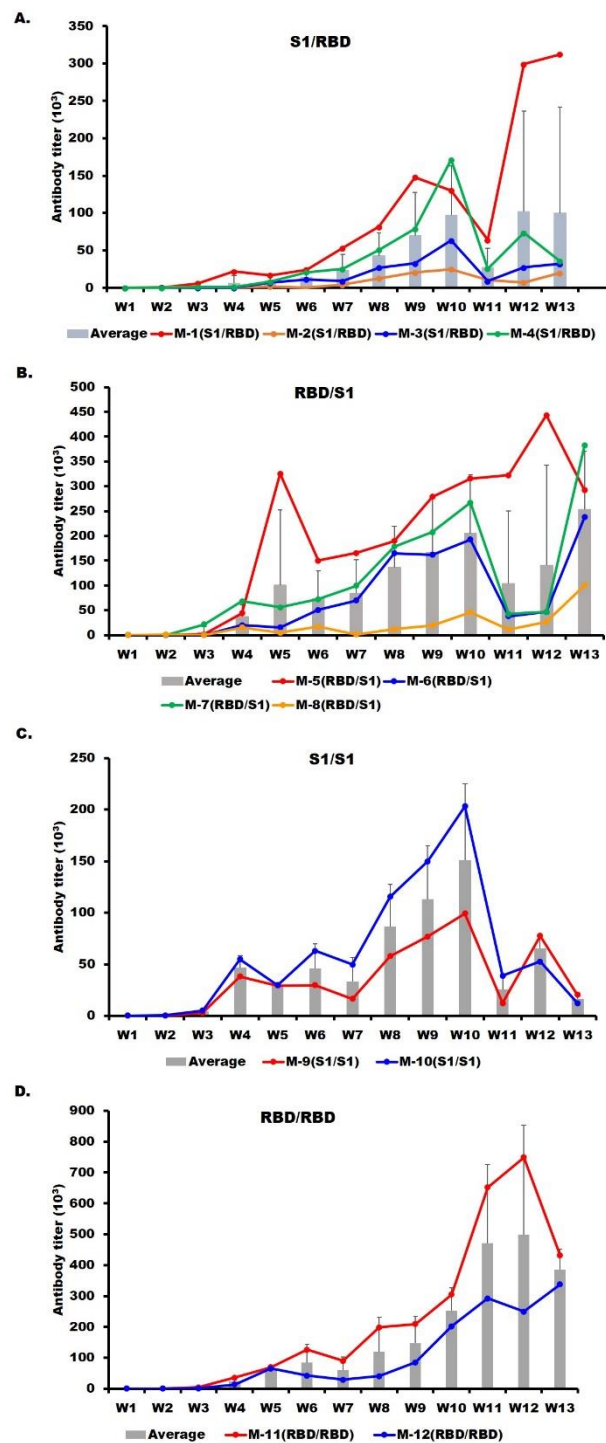

Figure S2: Anti-SARS-CoV-2 RBD sera (IgG) titer assayed by ELISA: IgG detection by ELISA was performed using the tail bleeding (TB) sera from each week for the groups **A.** S1/RBD, **B.** RBD/S1, **C.** S1/S1, **D.** RBD/RBD. **W** indicates the tail bleeding week. Each circle indicates an individual mouse's IgG titer and the bars show the average titer. **The results are indicated as mean  $\pm$  standard deviation (SD).**

**Table: S1**

**The average IgG antibody titer was assessed using the 10<sup>th</sup> week tail bleeding anti sera (the same sera is used for performing the pseudovirus neutralization assay).**

|                                   | <b>S1/RBD</b> | <b>RBD/S1</b> | <b>S1/S1</b> | <b>RBD/RBD</b> |
|-----------------------------------|---------------|---------------|--------------|----------------|
| Week 10<br>Average antibody titer | 97323.57      | 205266.88     | 151125.63    | 253204.41      |

**Table: S2**

**Percentage of neutralization assessed using Sars-CoV-2 D614G Pseudovirus with the 10<sup>th</sup> week tail bleeding anti sera.**

| <b>ID</b> | <b>Immunisation Group</b> | <b>% Neutralisation</b> |
|-----------|---------------------------|-------------------------|
| Mice1     | S1/RBD                    | 69.44                   |
| Mice2     | S1/RBD                    | 81.49                   |
| Mice3     | S1/RBD                    | 85.25                   |
| Mice4     | S1/RBD                    | 77.92                   |
| Mice5     | RBD/S1                    | 83.08                   |
| Mice6     | RBD/S1                    | 83.33                   |
| Mice7     | RBD/S1                    | 78.45                   |
| Mice8     | RBD/S1                    | 78.86                   |
| Mice9     | S1/S1                     | 48.12                   |
| Mice10    | S1/S1                     | 64.55                   |
| Mice11    | RBD/RBD                   | 50.43                   |
| Mice12    | RBD/RBD                   | 32.68                   |
